# Supplementary material for: Voriconazole Eye Drops: Enhanced Solubility and Stability through Ternary Voriconazole/Sulfobutyl Ether β-Cyclodextrin/Polyvinyl Alcohol Complexes
Source: MDPI journal article supplement (doi:10.3390/ijms24032343), 2023-01-25
Supplement: s1 [file s1]

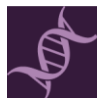

## Supplementary Materials

# Voriconazole Eye Drops: Enhanced Solubility and Stability through Ternary Voriconazole/Sulfobutyl Ether $\beta$ -cyclodextrin/Polyvinyl Alcohol Complexes

Hay Man Saung Hnin Soe <sup>1</sup>, Khanittha Kerdpol <sup>2</sup>, Thanyada Rungrotmongkol <sup>2,3</sup>, Patamaporn Pruksakorn <sup>4</sup>, Rinrapas Autthateinchai <sup>4</sup>, Sirawit Wet-osot <sup>4</sup>, Thorsteinn Loftsson <sup>5</sup> and Phatsawee Jansook <sup>1,\*</sup>

**Citation:** Soe, H.M.S.H.; Kerdpol, K.; Rungrotmongkol, T.; Pruksakorn, P.; Autthateinchai, R.; Wet-osot, S.; Loftsson, T.; Jansook, P.

Voriconazole eye drops: enhanced solubility and stability through ternary voriconazole/sulfobutyl ether  $\beta$ -cyclodextrin/polyvinyl alcohol complexes. *Int. J. Mol. Sci.* **2023**, *24*, x.

<https://doi.org/10.3390/xxxxx>

<sup>1</sup> Faculty of Pharmaceutical Sciences, Chulalongkorn University, 254 Phyathai Road, Pathumwan, 10330 Bangkok, Thailand; haymansaunghninsoe@gmail.com

<sup>2</sup> Center of Excellence in Biocatalyst and Sustainable Biotechnology, Department of Biochemistry, Faculty of Science, Chulalongkorn University, 254 Phyathai Road, Pathumwan, 10330 Bangkok, Thailand; khanittha.view@gmail.com (K.K.), thanyada.r@chula.ac.th (T.R.)

<sup>3</sup> Program in Bioinformatics and Computational Biology, Graduate School, Chulalongkorn University, 10330 Bangkok, Thailand; thanyada.r@chula.ac.th

<sup>4</sup> Department of Medical Sciences, Ministry of Public Health, Tiwanon Road, 11000 Nonthaburi, Thailand; patamaporn.p@dmsc.mail.go.th (P.P.), rinrapas.a@dmsc.mail.go.th (R.A.), sirawit.w@dmsc.mail.go.th (S.W.)

<sup>5</sup> Faculty of Pharmaceutical Sciences, University of Iceland, Hofsvallagata 53 IS-107 Reykjavik, Iceland; thorstlo@hi.is

\* Correspondence: phatsawee.j@chula.ac.th; Tel.: +662-218-8273

Academic Editor(s): Miguel A. Estes; Carmen M. Romero

Received: 12 January 2023  
Revision: 21 January 2023

Accepted: 23 January 2023  
Published: date

**Publisher's Note:** MDPI stays neutral with regard to jurisdictional claims in published maps and institutional affiliations.

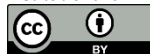

**Copyright:** © 2023 by the authors. Submitted for possible open access publication under the terms and conditions of the Creative Commons Attribution (CC BY) license (<http://creativecommons.org/licenses/by/4.0/>).

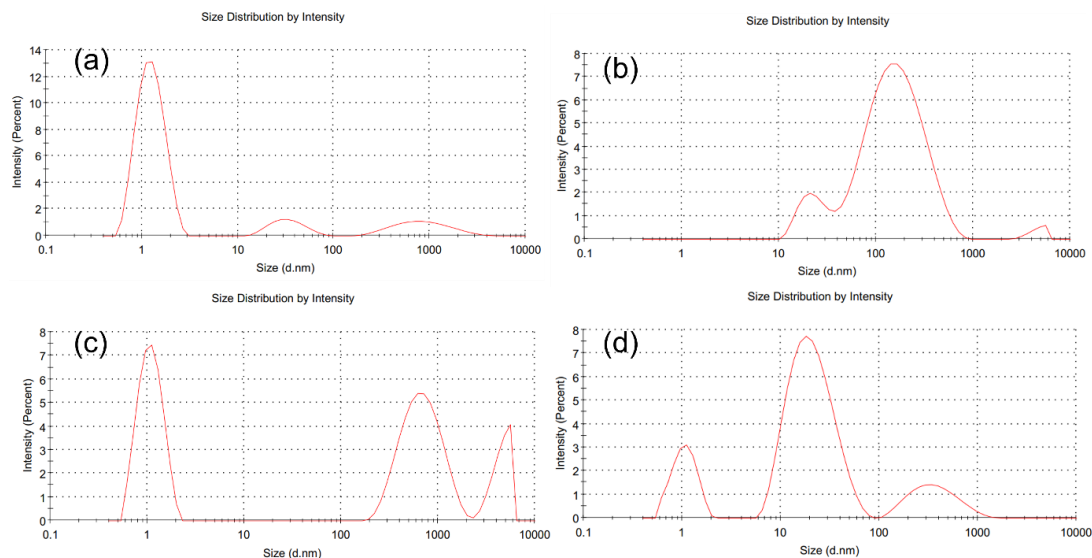

**Figure S1.** Aggregate size and size distribution by intensity of binary VCZ/SBE $\beta$ CD and ternary VCZ/SBE $\beta$ CD/polymer complex aggregates determined by DLS technique at 25 °C; (a) VCZ/SBE $\beta$ CD, (b) VCZ/SBE $\beta$ CD/CS, (c) VCZ/SBE $\beta$ CD/HA and (d) VCZ/SBE $\beta$ CD/PVA

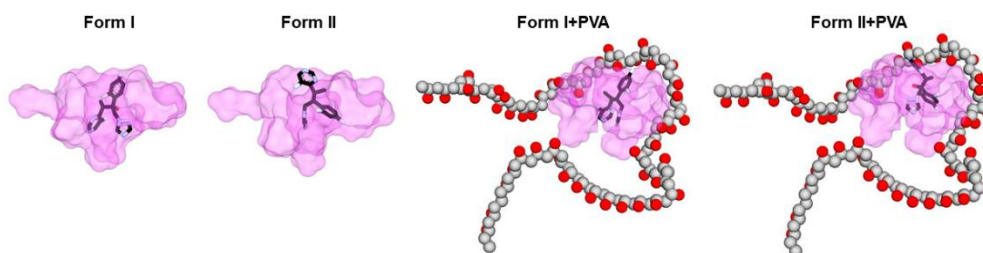

**Figure S2.** Two different forms of the VCZ/SBE $\beta$ CD and VCZ/SBE $\beta$ CD/PVA inclusion complexes generated from molecular docking protocol used as the initial models for MD simulations..

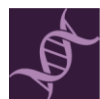

**Table S1.** Release kinetic model fitting of VCZ from PVA-L solution and PVA-H hydrogel.

| Formulation    | Zero order |        | First order |        |        | Higuchi |        | Hixson-Crowell |        | Korsmeyer-Peppas |        |        |
|----------------|------------|--------|-------------|--------|--------|---------|--------|----------------|--------|------------------|--------|--------|
|                | $K_0^a$    | $R^2$  | $K_1^b$     | $n$    | $R^2$  | $K_H^c$ | $R^2$  | $K_{Hc}^d$     | $R^2$  | $n^f$            | $K^e$  | $R^2$  |
| PVA-L solution | 1.0439     | 0.8028 | -0.0067     | 1.9506 | 0.8710 | 8.7126  | 0.9318 | 0.0208         | 0.1762 | 0.7446           | 0.6391 | 0.9120 |
| PVA-H hydrogel | 0.7511     | 0.8267 | -0.0041     | 1.9702 | 0.8628 | 6.2270  | 0.9469 | 0.0136         | 0.8512 | 0.7996           | 0.4040 | 0.9402 |

<sup>a</sup> $K_0$ : zero order release constant; <sup>b</sup> $K_1$ : first order release constant; <sup>c</sup> $K_H$ : Higuchi constant; <sup>d</sup> $K_{Hc}$ : Hixson-Crowell constant; <sup>e</sup> $K$ : Korsmeyer-Peppas constant; <sup>f</sup> $n$ : the diffusion or release exponent
